# Supplementary material for: Establishment of a Challenge Model for Sheeppox Virus Infection
Source: PubMed Central journal article supplement (PMC7765277; doi:10.3390/microorganisms8122001), 2020-12-15
Supplement: microorganisms-08-02001-s001.pdf [file microorganisms-08-02001-s001.pdf]

**Supplemental Table S1.** Pan Capripox real-time qPCR results of different sample matrices after inoculation with SPPV-“India/2013/Surankote” via different inoculation routes. The genome copy numbers per  $\mu\text{l}$  template are presented. For calculation of the genome copy number per ml sample material, the listed genome copies must be multiplied by a factor of 400.

| SPPV-<br>“India/2013/Surankote” |            | Genome copies/ $\mu\text{l}$ template at different days post inoculation |         |         |         |         |         |         |         |         |               |
|---------------------------------|------------|--------------------------------------------------------------------------|---------|---------|---------|---------|---------|---------|---------|---------|---------------|
| Animal                          | Matrix     | 0dpi                                                                     | 3dpi    | 5dpi    | 7dpi    | 10dpi   | 12dpi   | 14dpi   | 17dpi   | 21dpi   | 27*/<br>28dpi |
| IND-IV-09                       | EDTA blood | no Cq                                                                    | 4,8E+00 | 1,3E+01 | 3,2E+01 | 2,0E+02 | 2,2E+02 | 7,3E+00 | -       | -       | -             |
|                                 | serum      | no Cq                                                                    | 4,3E-01 | no Cq   | no Cq   | 1,2E+00 | 3,6E+00 | 2,6E+00 | -       | -       | -             |
|                                 | nasal swab | no Cq                                                                    | no Cq   | no Cq   | 1,6E+03 | 1,0E+03 | 3,1E+03 | 2,0E+04 | -       | -       | -             |
|                                 | oral swab  | no Cq                                                                    | no Cq   | no Cq   | 7,0E+00 | 1,1E+01 | 3,0E+01 | 1,1E+02 | -       | -       | -             |
| IND-IV-10                       | EDTA blood | no Cq                                                                    | 1,1E+00 | 1,9E+00 | 8,8E+01 | 7,4E+01 | -       | -       | -       | -       | -             |
|                                 | serum      | no Cq                                                                    | no Cq   | no Cq   | no Cq   | 8,3E-01 | -       | -       | -       | -       | -             |
|                                 | nasal swab | no Cq                                                                    | no Cq   | 1,8E+00 | 8,2E+01 | 2,5E+05 | -       | -       | -       | -       | -             |
|                                 | oral swab  | no Cq                                                                    | no Cq   | no Cq   | 1,8E+00 | 2,3E+01 | -       | -       | -       | -       | -             |
| IND-IV-11                       | EDTA blood | no Cq                                                                    | no Cq   | 2,7E+00 | -       | -       | -       | -       | -       | -       | -             |
|                                 | serum      | no Cq                                                                    | no Cq   | no Cq   | -       | -       | -       | -       | -       | -       | -             |
|                                 | nasal swab | no Cq                                                                    | no Cq   | 1,4E+00 | 1,2E+03 | -       | -       | -       | -       | -       | -             |
|                                 | oral swab  | no Cq                                                                    | no Cq   | 5,5E+00 | no Cq   | -       | -       | -       | -       | -       | -             |
| IND-IN-12                       | EDTA blood | no Cq                                                                    | no Cq   | 8,1E-01 | 1,6E+01 | 4,7E+01 | 1,2E+01 | 9,5E+00 | -       | -       | -             |
|                                 | serum      | no Cq                                                                    | no Cq   | no Cq   | no Cq   | 2,5E+00 | no Cq   | 5,4E-01 | -       | -       | -             |
|                                 | nasal swab | no Cq                                                                    | 6,3E+01 | 3,9E+05 | 4,3E+04 | 4,8E+05 | 4,8E+05 | 7,7E+04 | -       | -       | -             |
|                                 | oral swab  | no Cq                                                                    | no Cq   | 1,6E+01 | 1,2E+02 | 5,3E+02 | 6,0E+03 | 2,7E+02 | -       | -       | -             |
| IND-IN-13                       | EDTA blood | no Cq                                                                    | no Cq   | 1,3E+01 | 3,1E+01 | 6,4E+02 | -       | -       | -       | -       | -             |
|                                 | serum      | no Cq                                                                    | no Cq   | 6,9E-01 | no Cq   | 1,7E+01 | -       | -       | -       | -       | -             |
|                                 | nasal swab | no Cq                                                                    | 9,8E+02 | 3,6E+03 | 1,1E+05 | 7,5E+06 | -       | -       | -       | -       | -             |
|                                 | oral swab  | no Cq                                                                    | no Cq   | 9,3E+00 | 4,6E+02 | 1,0E+03 | -       | -       | -       | -       | -             |
| IND-IN-14                       | EDTA blood | no Cq                                                                    | no Cq   | no Cq   | 9,6E-01 | 5,8E-01 | 1,8E+00 | no Cq   | no Cq   | no Cq   | no Cq         |
|                                 | serum      | no Cq                                                                    | no Cq   | no Cq   | no Cq   | no Cq   | no Cq   | no Cq   | no Cq   | no Cq   | no Cq         |
|                                 | nasal swab | no Cq                                                                    | 1,0E+03 | 2,1E+02 | 8,2E+04 | 9,4E+05 | 5,2E+04 | 3,3E+03 | 1,5E+05 | 7,7E+04 | 1,2E+05       |
|                                 | oral swab  | no Cq                                                                    | no Cq   | 3,8E+00 | 7,7E+01 | 2,9E+01 | 3,2E+02 | 2,8E+02 | 6,3E+01 | 3,0E+02 | 6,5E+01       |
| IND-IC-15*                      | EDTA blood | no Cq                                                                    | no Cq   | no Cq   | no Cq   | no Cq   | 5,6E-01 | no Cq   | no Cq   | 1,1E+02 | 7,0E+01       |
|                                 | serum      | no Cq                                                                    | no Cq   | no Cq   | no Cq   | no Cq   | no Cq   | no Cq   | no Cq   | 1,0E+00 | 3,5E+00       |
|                                 | nasal swab | no Cq                                                                    | no Cq   | no Cq   | no Cq   | 4,3E+00 | 4,2E+01 | 5,4E+00 | 2,6E+01 | 6,3E+03 | 7,4E+03       |
|                                 | oral swab  | no Cq                                                                    | no Cq   | no Cq   | no Cq   | 2,4E+00 | 3,3E+00 | 3,1E+00 | 1,4E+00 | 1,3E+00 | 7,0E+03       |
| IND-IC-16                       | EDTA blood | no Cq                                                                    | no Cq   | no Cq   | no Cq   | no Cq   | no Cq   | no Cq   | no Cq   | no Cq   | no Cq         |
|                                 | serum      | no Cq                                                                    | no Cq   | no Cq   | no Cq   | no Cq   | no Cq   | no Cq   | no Cq   | no Cq   | no Cq         |
|                                 | nasal swab | no Cq                                                                    | no Cq   | 6,1E-01 | 5,0E+00 | 2,4E+00 | 9,5E+01 | 5,0E+01 | 2,9E+00 | 1,1E+00 | no Cq         |
|                                 | oral swab  | no Cq                                                                    | no Cq   | no Cq   | no Cq   | no Cq   | 7,4E+00 | 1,5E+00 | 2,3E+00 | 1,1E+01 | no Cq         |

**Supplemental Table S2.** Pan Capripox real-time qPCR results of different sample matrices after inoculation with SPPV-“Egypt/2018” via different inoculation routes. The genome copy numbers per  $\mu\text{l}$  template are presented. For calculation of the genome copy number per ml sample material, the listed genome copies must be multiplied by a factor of 400.

| SPPV-“Egypt/2018” |            | Genome copies/ $\mu\text{l}$ template at different days post inoculation |         |         |         |         |         |         |           |         |           |
|-------------------|------------|--------------------------------------------------------------------------|---------|---------|---------|---------|---------|---------|-----------|---------|-----------|
| Animal            | Matrix     | 0dpi                                                                     | 3dpi    | 5dpi    | 7dpi    | 10dpi   | 12dpi   | 14dpi   | 16*/17dpi | 21dpi   | 27*/28dpi |
| EG-IV-01          | EDTA blood | no Cq                                                                    | no Cq   | 7,8E-01 | 5,6E-01 | no Cq   | 1,4E+00 | 8,7E-01 | no Cq     | 6,9E-01 | no Cq     |
|                   | serum      | no Cq                                                                    | no Cq   | no Cq   | no Cq   | 2,1E+00 | 7,7E-01 | 2,7E+00 | no Cq     | no Cq   | no Cq     |
|                   | nasal swab | no Cq                                                                    | no Cq   | no Cq   | 5,3E+00 | 1,3E+05 | 1,5E+05 | 3,3E+04 | 4,8E+02   | 1,0E+03 | 1,6E+02   |
| EG-IV-02          | oral swab  | no Cq                                                                    | no Cq   | no Cq   | no Cq   | 1,1E+01 | 9,6E+01 | 2,3E+02 | 1,1E+02   | 4,0E+01 | 2,0E+00   |
|                   | EDTA blood | no Cq                                                                    | no Cq   | 2,4E+01 | 7,1E+01 | 1,3E+02 | 1,2E+02 | 4,7E+02 | -         | -       | -         |
|                   | serum      | no Cq                                                                    | no Cq   | 1,5E+00 | 8,7E-01 | 5,1E+00 | 3,8E+00 | 1,6E+02 | -         | -       | -         |
| EG-IV-03          | nasal swab | no Cq                                                                    | 1,4E+01 | 4,1E+01 | 6,8E+01 | 6,2E+05 | 1,1E+05 | 1,5E+05 | -         | -       | -         |
|                   | oral swab  | no Cq                                                                    | no Cq   | no Cq   | 1,3E+01 | 1,5E+02 | 1,9E+03 | 4,3E+02 | -         | -       | -         |
|                   | EDTA blood | no Cq                                                                    | 2,8E+01 | 5,3E+00 | 5,2E+00 | 1,7E+00 | no Cq   | 2,7E+00 | no Cq     | no Cq   | no Cq     |
| EG-IV-04*         | serum      | no Cq                                                                    | 3,2E+01 | no Cq   | no Cq   | 6,3E-01 | 1,2E+00 | no Cq   | no Cq     | no Cq   | no Cq     |
|                   | nasal swab | no Cq                                                                    | no Cq   | no Cq   | 2,2E+01 | 5,7E+04 | 2,5E+04 | 2,0E+03 | 1,3E+02   | 1,0E+02 | 1,2E+02   |
|                   | oral swab  | no Cq                                                                    | no Cq   | no Cq   | 4,9E+00 | 1,2E+01 | 1,2E+02 | 3,8E+02 | 8,9E+01   | 1,6E+01 | 1,0E+00   |
| EG-IN-04*         | EDTA blood | no Cq                                                                    | no Cq   | 7,9E-01 | 3,4E+00 | 1,1E+01 | 1,3E+00 | no Cq   | 6,7E-01   | -       | -         |
|                   | serum      | no Cq                                                                    | no Cq   | no Cq   | no Cq   | 5,1E-01 | 1,3E+00 | no Cq   | no Cq     | -       | -         |
|                   | nasal swab | no Cq                                                                    | 6,1E+02 | 1,2E+02 | 5,6E+03 | 5,8E+05 | 2,1E+05 | 7,7E+05 | 6,0E+04   | -       | -         |
| EG-IN-05*         | oral swab  | no Cq                                                                    | no Cq   | 2,7E+00 | 2,2E+02 | 1,0E+03 | 1,8E+03 | 6,1E+02 | 5,7E+01   | -       | -         |
|                   | EDTA blood | no Cq                                                                    | no Cq   | no Cq   | no Cq   | 2,3E+00 | no Cq   | no Cq   | 2,2E-01   | -       | -         |
|                   | serum      | no Cq                                                                    | no Cq   | no Cq   | no Cq   | 4,6E-01 | 1,1E+00 | no Cq   | no Cq     | -       | -         |
| EG-IN-06          | nasal swab | no Cq                                                                    | 2,0E+02 | 2,3E+04 | 2,2E+04 | 3,1E+05 | 1,1E+06 | 2,7E+05 | 8,0E+05   | -       | -         |
|                   | oral swab  | no Cq                                                                    | no Cq   | 1,9E+00 | 1,5E+01 | 1,1E+02 | 4,7E+02 | 2,8E+02 | 1,6E+02   | -       | -         |
|                   | EDTA blood | no Cq                                                                    | no Cq   | 8,8E+00 | 7,3E+00 | 1,0E+01 | 1,8E+00 | 1,8E+00 | -         | -       | -         |
| EG-IN-07*         | serum      | no Cq                                                                    | no Cq   | no Cq   | no Cq   | 1,8E+00 | 1,7E+00 | 4,6E-01 | -         | -       | -         |
|                   | nasal swab | no Cq                                                                    | 5,1E+00 | 5,8E+04 | 2,9E+05 | 1,0E+06 | 7,4E+05 | 2,2E+05 | -         | -       | -         |
|                   | oral swab  | no Cq                                                                    | no Cq   | 1,7E+01 | 1,4E+02 | 3,2E+02 | 3,4E+03 | 9,5E+02 | -         | -       | -         |
| EG-IC-08          | EDTA blood | no Cq                                                                    | no Cq   | no Cq   | no Cq   | no Cq   | no Cq   | no Cq   | 1,5E+00   | 3,5E+02 | 2,4E+01   |
|                   | serum      | no Cq                                                                    | no Cq   | no Cq   | no Cq   | no Cq   | no Cq   | no Cq   | no Cq     | 4,4E+00 | 3,9E+00   |
|                   | nasal swab | no Cq                                                                    | no Cq   | no Cq   | 1,3E+00 | 5,2E+00 | 3,9E+01 | 1,1E+01 | 6,3E+01   | 3,1E+05 | 8,9E+04   |
| EG-IC-07*         | oral swab  | no Cq                                                                    | no Cq   | no Cq   | no Cq   | 7,2E-01 | 1,1E+00 | 4,0E+00 | 2,0E+01   | 4,3E+01 | 6,4E+03   |
|                   | EDTA blood | no Cq                                                                    | no Cq   | no Cq   | no Cq   | 8,4E+01 | 5,1E+01 | 3,2E+02 | -         | -       | -         |
|                   | serum      | no Cq                                                                    | no Cq   | no Cq   | no Cq   | 2,4E+00 | no Cq   | 5,0E+00 | -         | -       | -         |
| EG-IC-08          | nasal swab | no Cq                                                                    | no Cq   | no Cq   | no Cq   | 4,8E+01 | 1,4E+02 | 8,3E+05 | -         | -       | -         |
|                   | oral swab  | no Cq                                                                    | no Cq   | no Cq   | no Cq   | no Cq   | 3,8E+00 | 2,5E+02 | -         | -       | -         |

**Supplemental Table S3.** Pan Capripox real-time qPCR results of different tissue samples of sheep after inoculation with SPPV-“India/2013/Surankote” via different inoculation routes. The genome copy numbers per  $\mu\text{l}$  template are presented. For calculation of the genome copy number per g tissue material, the listed genome copies must be multiplied by a factor of 4000.

| SPPV-<br>"India/2013/Surankote" |               | Genome copies/ $\mu\text{l}$ template |           |              |           |           |            |           |
|---------------------------------|---------------|---------------------------------------|-----------|--------------|-----------|-----------|------------|-----------|
| Organ Sample                    | Intravenously |                                       |           | Intranasally |           |           | In-Contact |           |
|                                 | IND-IV-09     | IND-IV-10                             | IND-IV-11 | IND-IN-12    | IND-IN-13 | IND-IN-14 | IND-IC-15  | IND-IC-16 |
| cervical lymph node             | 5,0E+01       | 1,3E+01                               | 2,0E+01   | 4,0E+00      | 1,5E+03   | no Cq     | 7,6E+01    | no Cq     |
| mediastinal lymph node          | no Cq         | 1,3E+01                               | 5,0E+01   | no Cq        | no Cq     | no Cq     | no Cq      | no Cq     |
| mesenterial lymph node          | no Cq         | no Cq                                 | no Cq     | no Cq        | no Cq     | no Cq     | 2,6E+00    | no Cq     |
| liver                           | no Cq         | no Cq                                 | 6,8E+00   | no Cq        | 1,4E+00   | no Cq     | 2,1E+00    | no Cq     |
| spleen                          | no Cq         | no Cq                                 | 1,4E+00   | no Cq        | 5,6E+00   | no Cq     | no Cq      | no Cq     |
| lung                            | 5,2E+00       | 8,3E+02                               | 1,2E+04   | no Cq        | 1,2E+01   | no Cq     | 9,5E-01    | no Cq     |
| <b>Additional Samples</b>       |               |                                       |           |              |           |           |            |           |
| coagulated heart blood          |               |                                       | 1,4E+02   |              |           |           |            |           |
| lung fluid                      |               |                                       | 3,7E+01   |              |           |           |            |           |
| <b>Location of Skin Sample</b>  |               |                                       |           |              |           |           |            |           |
| breast                          |               | 1,4E+02                               |           |              | 2,6E+02   |           |            |           |
|                                 |               | 1,2E+05                               |           |              | 1,4E+02   |           |            |           |
|                                 |               | 2,1E+02                               |           |              | 1,0E+04   |           |            |           |
|                                 |               | 6,2E+04                               |           |              | 3,0E+02   |           |            |           |
| axilla                          | 8,5E+05       | 2,9E+02                               | 3,7E+04   | 2,1E+00      | 5,5E+02   |           | 1,5E+03    |           |
|                                 | 1,2E+02       | 2,8E+03                               | 4,0E+02   | 1,2E+00      | 6,1E+03   |           | 8,9E+03    |           |
|                                 | 5,9E+02       | 6,3E+01                               | 7,3E+01   | 1,4E+00      | 5,0E+03   |           | 3,8E+03    |           |
|                                 | 1,6E+02       | 4,4E+04                               | 5,4E+03   | 7,8E-01      | 8,1E+03   |           | 3,5E+02    |           |
| back                            |               |                                       |           |              | 8,8E+03   |           |            |           |
|                                 |               |                                       |           |              | 1,3E+03   |           |            |           |
|                                 |               |                                       |           |              | 4,8E+05   |           |            |           |
|                                 |               |                                       |           |              | 6,6E+05   |           |            |           |
| hind leg                        |               | 1,5E+01                               |           |              | 3,5E+04   |           | 4,1E+04    |           |
|                                 |               | 3,0E+01                               |           |              | 2,3E+05   |           | 1,0E+05    |           |
|                                 |               | 7,2E+01                               |           |              | 2,5E+05   |           | 5,8E+04    |           |
|                                 |               | 2,5E+01                               |           |              | 3,0E+05   |           | 1,3E+05    |           |
| tail                            |               |                                       |           |              |           | 1,2E+05   |            |           |
| scrotum                         |               | 7,9E+04                               |           |              | 1,6E+03   |           | 4,1E+04    |           |
|                                 |               |                                       |           |              | 4,3E+02   |           | 1,0E+05    |           |
| prepuce                         |               | 2,4E+05                               |           |              | 4,1E+05   |           | 1,7E+05    |           |
|                                 |               | 2,7E+05                               |           |              |           |           | 8,0E+05    |           |
| pox-like lesion lung            | 2,1E+00       |                                       |           |              |           |           | 2,2E+04    |           |
|                                 | 2,5E+00       |                                       |           |              |           |           | 7,5E+00    |           |

**Supplemental Table S4.** Pan Capripox real-time qPCR results of different tissue samples of sheep after inoculation with SPPV-“Egypt/2018” via different inoculation routes. The genome copy numbers per  $\mu$ l template are presented. For calculation of the genome copy number per g tissue material, the listed genome copies must be multiplied by a factor of 4000.

| SPPV-"Egypt/2018"              | Genome copies/ $\mu$ l template                          |                                              |                                                          |                                  |                                  |          |                                  |                                  |          |
|--------------------------------|----------------------------------------------------------|----------------------------------------------|----------------------------------------------------------|----------------------------------|----------------------------------|----------|----------------------------------|----------------------------------|----------|
|                                | Organ Sample                                             | Intravenously                                |                                                          |                                  | Intranasally                     |          |                                  | In-Contact                       |          |
|                                |                                                          | EG-IV-01                                     | EG-IV-02                                                 | EG-IV-03                         | EG-IN-04                         | EG-IN-05 | EG-IN-06                         | EG-IC-07                         | EG-IC-08 |
| cervical lymph node            | no Cq                                                    | 2,54E+01                                     | no Cq                                                    | 2,30E+01                         | no Cq                            | no Cq    | 7,25E+02                         | 2,19E+02                         |          |
| mediastinal lymph node         | 1,42E+00                                                 | no Cq                                        | no Cq                                                    | 7,71E-01                         | no Cq                            | no Cq    | 1,10E+01                         | 3,31E-01                         |          |
| mesenterial lymph node         | no Cq                                                    | 1,05E+00                                     | no Cq                                                    | no Cq                            | 2,26E+00                         | no Cq    | 6,76E-01                         | no Cq                            |          |
| liver                          | no Cq                                                    | no Cq                                        | no Cq                                                    | no Cq                            | no Cq                            | no Cq    | no Cq                            | no Cq                            |          |
| spleen                         | 6,18E-01                                                 | 2,63E+01                                     | 6,60E-01                                                 | 1,07E+00                         | no Cq                            | 4,20E-01 | 2,37E-01                         | 1,03E+00                         |          |
| lung                           | no Cq                                                    | 7,36E+01                                     | 7,14E-01                                                 | 7,57E+00                         | 1,10E+01                         | 5,50E+00 | 2,92E+00                         | 8,89E+00                         |          |
| <b>Additional Samples</b>      |                                                          |                                              |                                                          |                                  |                                  |          |                                  |                                  |          |
| brain                          |                                                          |                                              |                                                          |                                  |                                  |          |                                  | no Cq<br>no Cq<br>no Cq          |          |
| nasal septum                   |                                                          |                                              |                                                          | 3,55E+04                         | 3,51E+02                         |          |                                  |                                  |          |
| <b>Location of Skin Sample</b> |                                                          |                                              |                                                          |                                  |                                  |          |                                  |                                  |          |
| ear                            |                                                          |                                              |                                                          |                                  | 7,94E+05<br>3,02E+06<br>1,18E+06 |          |                                  |                                  |          |
| foreleg                        |                                                          |                                              |                                                          |                                  |                                  |          | 3,13E+05<br>7,05E+04             |                                  |          |
| axilla                         |                                                          | 1,90E+04<br>4,15E+04<br>2,11E+04<br>1,84E+05 |                                                          |                                  |                                  |          |                                  | 6,32E+03<br>1,66E+04<br>2,70E+02 |          |
| hind leg                       |                                                          |                                              |                                                          |                                  |                                  |          | 9,98E+04                         |                                  |          |
| tail                           |                                                          |                                              |                                                          |                                  |                                  |          | 3,15E+05<br>1,65E+05<br>7,73E+04 |                                  |          |
| prepuce                        |                                                          | 1,03E+06<br>2,98E+06                         |                                                          | 1,73E+04<br>8,67E+04             |                                  |          | 6,05E+04<br>9,42E+05             | 2,79E+05                         |          |
| pox-like lesion lung           |                                                          |                                              |                                                          | 1,06E+03<br>1,26E+03<br>4,75E+02 | 1,44E+01                         |          |                                  |                                  |          |
| healed skin lesion             | 3,47E+02<br>4,22E+02<br>2,45E+01<br>2,81E+02<br>1,72E+03 |                                              | 8,02E+03<br>9,70E+04<br>3,62E+03<br>7,70E+01             |                                  | 5,30E+03                         |          |                                  |                                  |          |
| scab of skin lesion            |                                                          |                                              | 5,47E+06<br>1,67E+06<br>1,27E+06<br>3,70E+05<br>4,48E+06 |                                  |                                  |          |                                  |                                  |          |
